# Supplementary material for: Use of Fidelity Assessments to Train Clinicians in the CBT for PTSD Program for Clients With Serious Mental Illness
Source: Atypon-hosted journal article supplement (doi:10.1176/appi.ps.201000458), 2012-08-01
Supplement: pss6308_0785_ds.pdf [file pss6308_0785_ds.pdf]

## Appendix

### CBT for PTSD Fidelity Scale

Therapist: \_\_\_\_\_ Location: \_\_\_\_\_

Client ID: \_\_\_\_\_ Session #: \_\_\_\_\_ Date of Session: \_\_\_\_\_

Rater: \_\_\_\_\_ Date of Rating: \_\_\_\_\_

For each item, assess the therapist on a scale of 1-5 and record the rating on the line next to the item number.

|      |            |              |      |           |                |
|------|------------|--------------|------|-----------|----------------|
| 1    | 2          | 3            | 4    | 5         | NA             |
| Poor | Borderline | Satisfactory | Good | Excellent | Not Applicable |

\_\_\_\_ 1. **Agenda Setting**

Articulate specific agenda  
Identify other issues  
Implement specific agenda

\_\_\_\_ 2. **Homework Review**

Review prior homework  
Praise all efforts  
Troubleshoot obstacles

\_\_\_\_ 3. **Overview of Program**

Focus of treatment program  
Length of program & logistics  
Description of treatment components

\_\_\_\_ 4. **Crisis Plan**

Rationale  
Discussion of nature of crises  
Warning signs of crisis  
Identification of resources  
Discussion of response plan  
Written crisis plan

\_\_\_\_ 5. **Breathing Retraining**

Rationale  
Explanation  
Demonstration

Practice by client

- \_\_\_ **6. Use of Educational Materials**
  - Utilize handouts & worksheets
  - Distribute & review materials
  - Elicit & answer questions
  
- \_\_\_ **7. Psychoeducation**
  - Information about trauma & PTSD
  - Information about associated symptoms
  - Elicit client's symptoms
  - Answer questions
  
- \_\_\_ **8. Cognitive Restructuring**
  - Thought-feeling model
  - Connect negative feelings to thoughts
  - Challenge thoughts
  - Generate alternative thoughts
  - Practice alternative thoughts
  
- \_\_\_ **9. Development of Action Plans**
  - Identify realistic concerns
  - Establish feasible goal
  - Explore possible options
  - Develop specific plan to address problem
  
- \_\_\_ **10. Trauma Focus**
  - Effects of trauma & PTSD on functioning
  - Monitor & discuss PTSD symptoms
  - Connection between trauma & beliefs
  - Challenge trauma-related beliefs
  - Cope with traumatic memories
  
- \_\_\_ **11. Assign Homework**
  - Develop homework assignment
  - Collaborate with client
  - Make specific plan
  - Troubleshoot obstacles
  
- \_\_\_ **12. Manual Adherence**
  - Follow session format
  - Use of manual rationale & teaching strategies
  - Show flexibility in face of problems
  
- \_\_\_ **13. Teaching Effectiveness**
  - Instill motivation to learn information & skills

Teach information & skills  
Modeling/Practice of skills  
Adaptation of skills as needed  
Reinforcement of small steps/Shaping  
Encouragement  
Use significant others to facilitate learning

\_\_\_\_ 14. **Interpersonal Effectiveness**

Facilitate communication (empathic nature)  
Use client's own language & phrases  
Warm/Confident/Professional  
Provision of hope

\_\_\_\_ 15. **Pacing and Efficient Use of Time**

Session length kept to 1 hour  
Efficient structuring of time  
Tactful limiting of peripheral & unproductive discussion

\_\_\_\_ 16. **Reduction of Client Distress**

Identify & respond to client distress  
Empathy to show understanding  
Use of education or CBT skills to reduce distress  
Make plan to address persistent distress

\_\_\_\_ 17. **Overall Session Quality**
